# Supplementary material for: Evaluation of Factors Associated With Unmet Needs in Adult Cancer Survivors in Canada
Source: PubMed Central journal article supplement (PMC7060489; doi:10.1001/jamanetworkopen.2020.0506), 2020-03-06
Supplement: jamanetwopen-3-e200506-s001.pdf [file jamanetwopen-3-e200506-s001.pdf]

## Supplementary Online Content

Shakeel S, Tung J, Rahal R, Finley C. Evaluation of factors associated with unmet needs in adult cancer survivors in Canada. *JAMA Netw Open*. 2020;3(3):e200506. doi:10.1001/jamanetworkopen.2020.0506

**eAppendix.** Excerpts From Survey Questions on Physical, Emotional, and Practical Concerns, Help Sought, and Unmet Needs

This supplementary material has been provided by the authors to give readers additional information about their work.

**eAppendix.** Excerpts From Survey Questions on Physical, Emotional, and Practical Concerns, Help Sought, and Unmet Needs

**PHYSICAL CHALLENGES**

|                                                                 | <b>How much was this a concern for you?</b>                                                                                                                             | <b>Did you seek help for this concern?</b>                                      | <b>How easy was it to get help for this concern?</b>                                                                                                                                       |
|-----------------------------------------------------------------|-------------------------------------------------------------------------------------------------------------------------------------------------------------------------|---------------------------------------------------------------------------------|--------------------------------------------------------------------------------------------------------------------------------------------------------------------------------------------|
| Swelling of arms or legs (lymphedema)                           | <input type="checkbox"/> Big<br><input type="checkbox"/> Moderate<br><input type="checkbox"/> Small<br><input type="checkbox"/> Not a concern, <b>move to next item</b> | <input type="checkbox"/> Yes<br><input type="checkbox"/> No... <b>Next item</b> | <input type="checkbox"/> Very easy<br><input type="checkbox"/> Easy<br><input type="checkbox"/> Hard<br><input type="checkbox"/> Very hard<br><input type="checkbox"/> Didn't get any help |
| Fatigue, tiredness                                              | <input type="checkbox"/> Big<br><input type="checkbox"/> Moderate<br><input type="checkbox"/> Small<br><input type="checkbox"/> Not a concern, <b>move to next item</b> | <input type="checkbox"/> Yes<br><input type="checkbox"/> No... <b>Next item</b> | <input type="checkbox"/> Very easy<br><input type="checkbox"/> Easy<br><input type="checkbox"/> Hard<br><input type="checkbox"/> Very hard<br><input type="checkbox"/> Didn't get any help |
| Hormonal, menopause, or fertility                               | <input type="checkbox"/> Big<br><input type="checkbox"/> Moderate<br><input type="checkbox"/> Small<br><input type="checkbox"/> Not a concern, <b>move to next item</b> | <input type="checkbox"/> Yes<br><input type="checkbox"/> No... <b>Next item</b> | <input type="checkbox"/> Very easy<br><input type="checkbox"/> Easy<br><input type="checkbox"/> Hard<br><input type="checkbox"/> Very hard<br><input type="checkbox"/> Didn't get any help |
| Chronic pain or long term pain                                  | <input type="checkbox"/> Big<br><input type="checkbox"/> Moderate<br><input type="checkbox"/> Small<br><input type="checkbox"/> Not a concern, <b>move to next item</b> | <input type="checkbox"/> Yes<br><input type="checkbox"/> No... <b>Next item</b> | <input type="checkbox"/> Very easy<br><input type="checkbox"/> Easy<br><input type="checkbox"/> Hard<br><input type="checkbox"/> Very hard<br><input type="checkbox"/> Didn't get any help |
| Bladder and/or urinary problems (e.g., incontinence)            | <input type="checkbox"/> Big<br><input type="checkbox"/> Moderate<br><input type="checkbox"/> Small<br><input type="checkbox"/> Not a concern, <b>move to next item</b> | <input type="checkbox"/> Yes<br><input type="checkbox"/> No... <b>Next item</b> | <input type="checkbox"/> Very easy<br><input type="checkbox"/> Easy<br><input type="checkbox"/> Hard<br><input type="checkbox"/> Very hard<br><input type="checkbox"/> Didn't get any help |
| Gastrointestinal problems (e.g., digestion and/or bowel issues) | <input type="checkbox"/> Big<br><input type="checkbox"/> Moderate<br><input type="checkbox"/> Small<br><input type="checkbox"/> Not a concern, <b>move to next item</b> | <input type="checkbox"/> Yes<br><input type="checkbox"/> No... <b>Next item</b> | <input type="checkbox"/> Very easy<br><input type="checkbox"/> Easy<br><input type="checkbox"/> Hard<br><input type="checkbox"/> Very hard<br><input type="checkbox"/> Didn't get any help |
| Nerve problems (numbness or tingling)                           | <input type="checkbox"/> Big<br><input type="checkbox"/> Moderate<br><input type="checkbox"/> Small<br><input type="checkbox"/> Not a concern, <b>move to next item</b> | <input type="checkbox"/> Yes<br><input type="checkbox"/> No... <b>Next item</b> | <input type="checkbox"/> Very easy<br><input type="checkbox"/> Easy<br><input type="checkbox"/> Hard<br><input type="checkbox"/> Very hard<br><input type="checkbox"/> Didn't get any help |
| Changes to concentration, memory                                | <input type="checkbox"/> Big<br><input type="checkbox"/> Moderate<br><input type="checkbox"/> Small<br><input type="checkbox"/> Not a concern, <b>move to next item</b> | <input type="checkbox"/> Yes<br><input type="checkbox"/> No... <b>Next item</b> | <input type="checkbox"/> Very easy<br><input type="checkbox"/> Easy<br><input type="checkbox"/> Hard<br><input type="checkbox"/> Very hard<br><input type="checkbox"/> Didn't get any help |
| Changes in sexual activity or function                          | <input type="checkbox"/> Big<br><input type="checkbox"/> Moderate<br><input type="checkbox"/> Small<br><input type="checkbox"/> Not a concern, <b>move to next item</b> | <input type="checkbox"/> Yes<br><input type="checkbox"/> No... <b>Next item</b> | <input type="checkbox"/> Very easy<br><input type="checkbox"/> Easy<br><input type="checkbox"/> Hard<br><input type="checkbox"/> Very hard<br><input type="checkbox"/> Didn't get any help |

**EMOTIONAL CHALLENGES**

|                                                              | <b>How much was this a concern for you?</b>                                                                                                                             | <b>Did you seek help for this concern?</b>                                      | <b>How easy was it to get help for this concern?</b>                                                                                                                                       |
|--------------------------------------------------------------|-------------------------------------------------------------------------------------------------------------------------------------------------------------------------|---------------------------------------------------------------------------------|--------------------------------------------------------------------------------------------------------------------------------------------------------------------------------------------|
| Depression, sadness, loss of interest in everyday things     | <input type="checkbox"/> Big<br><input type="checkbox"/> Moderate<br><input type="checkbox"/> Small<br><input type="checkbox"/> Not a concern, <b>move to next item</b> | <input type="checkbox"/> Yes<br><input type="checkbox"/> No... <b>Next item</b> | <input type="checkbox"/> Very easy<br><input type="checkbox"/> Easy<br><input type="checkbox"/> Hard<br><input type="checkbox"/> Very hard<br><input type="checkbox"/> Didn't get any help |
| Anxiety, stress, worry about cancer returning                | <input type="checkbox"/> Big<br><input type="checkbox"/> Moderate<br><input type="checkbox"/> Small<br><input type="checkbox"/> Not a concern, <b>move to next item</b> | <input type="checkbox"/> Yes<br><input type="checkbox"/> No... <b>Next item</b> | <input type="checkbox"/> Very easy<br><input type="checkbox"/> Easy<br><input type="checkbox"/> Hard<br><input type="checkbox"/> Very hard<br><input type="checkbox"/> Didn't get any help |
| Changes in relationships with family, partners               | <input type="checkbox"/> Big<br><input type="checkbox"/> Moderate<br><input type="checkbox"/> Small<br><input type="checkbox"/> Not a concern, <b>move to next item</b> | <input type="checkbox"/> Yes<br><input type="checkbox"/> No... <b>Next item</b> | <input type="checkbox"/> Very easy<br><input type="checkbox"/> Easy<br><input type="checkbox"/> Hard<br><input type="checkbox"/> Very hard<br><input type="checkbox"/> Didn't get any help |
| Changes in relationships with friends or coworkers           | <input type="checkbox"/> Big<br><input type="checkbox"/> Moderate<br><input type="checkbox"/> Small<br><input type="checkbox"/> Not a concern, <b>move to next item</b> | <input type="checkbox"/> Yes<br><input type="checkbox"/> No... <b>Next item</b> | <input type="checkbox"/> Very easy<br><input type="checkbox"/> Easy<br><input type="checkbox"/> Hard<br><input type="checkbox"/> Very hard<br><input type="checkbox"/> Didn't get any help |
| Changes in body image (i.e., confidence in appearance, etc.) | <input type="checkbox"/> Big<br><input type="checkbox"/> Moderate<br><input type="checkbox"/> Small<br><input type="checkbox"/> Not a concern, <b>move to next item</b> | <input type="checkbox"/> Yes<br><input type="checkbox"/> No... <b>Next item</b> | <input type="checkbox"/> Very easy<br><input type="checkbox"/> Easy<br><input type="checkbox"/> Hard<br><input type="checkbox"/> Very hard<br><input type="checkbox"/> Didn't get any help |
| Changes in sexual intimacy                                   | <input type="checkbox"/> Big<br><input type="checkbox"/> Moderate<br><input type="checkbox"/> Small<br><input type="checkbox"/> Not a concern, <b>move to next item</b> | <input type="checkbox"/> Yes<br><input type="checkbox"/> No... <b>Next item</b> | <input type="checkbox"/> Very easy<br><input type="checkbox"/> Easy<br><input type="checkbox"/> Hard<br><input type="checkbox"/> Very hard<br><input type="checkbox"/> Didn't get any help |

**PRACTICAL CHALLENGES**

|                                                                                                 | <b>How much was this a concern for you?</b>                                                                                                                             | <b>Did you seek help for this concern?</b>                                      | <b>How easy was it to get help for this concern?</b>                                                                                                                                       |
|-------------------------------------------------------------------------------------------------|-------------------------------------------------------------------------------------------------------------------------------------------------------------------------|---------------------------------------------------------------------------------|--------------------------------------------------------------------------------------------------------------------------------------------------------------------------------------------|
| Returning to work or school, now or in the future                                               | <input type="checkbox"/> Big<br><input type="checkbox"/> Moderate<br><input type="checkbox"/> Small<br><input type="checkbox"/> Not a concern, <b>move to next item</b> | <input type="checkbox"/> Yes<br><input type="checkbox"/> No... <b>Next item</b> | <input type="checkbox"/> Very easy<br><input type="checkbox"/> Easy<br><input type="checkbox"/> Hard<br><input type="checkbox"/> Very hard<br><input type="checkbox"/> Didn't get any help |
| Getting to and from appointments                                                                | <input type="checkbox"/> Big<br><input type="checkbox"/> Moderate<br><input type="checkbox"/> Small<br><input type="checkbox"/> Not a concern, <b>move to next item</b> | <input type="checkbox"/> Yes<br><input type="checkbox"/> No... <b>Next item</b> | <input type="checkbox"/> Very easy<br><input type="checkbox"/> Easy<br><input type="checkbox"/> Hard<br><input type="checkbox"/> Very hard<br><input type="checkbox"/> Didn't get any help |
| Taking care of children, elders, or other family members                                        | <input type="checkbox"/> Big<br><input type="checkbox"/> Moderate<br><input type="checkbox"/> Small<br><input type="checkbox"/> Not a concern, <b>move to next item</b> | <input type="checkbox"/> Yes<br><input type="checkbox"/> No... <b>Next item</b> | <input type="checkbox"/> Very easy<br><input type="checkbox"/> Easy<br><input type="checkbox"/> Hard<br><input type="checkbox"/> Very hard<br><input type="checkbox"/> Didn't get any help |
| Difficulty getting health or life insurance                                                     | <input type="checkbox"/> Big<br><input type="checkbox"/> Moderate<br><input type="checkbox"/> Small<br><input type="checkbox"/> Not a concern, <b>move to next item</b> | <input type="checkbox"/> Yes<br><input type="checkbox"/> No... <b>Next item</b> | <input type="checkbox"/> Very easy<br><input type="checkbox"/> Easy<br><input type="checkbox"/> Hard<br><input type="checkbox"/> Very hard<br><input type="checkbox"/> Didn't get any help |
| Paying health care bills (e.g., treatment, services, travel to appointments, assistive devices) | <input type="checkbox"/> Big<br><input type="checkbox"/> Moderate<br><input type="checkbox"/> Small<br><input type="checkbox"/> Not a concern, <b>move to next item</b> | <input type="checkbox"/> Yes<br><input type="checkbox"/> No... <b>Next item</b> | <input type="checkbox"/> Very easy<br><input type="checkbox"/> Easy<br><input type="checkbox"/> Hard<br><input type="checkbox"/> Very hard<br><input type="checkbox"/> Didn't get any help |
